# Supplementary material for: Probiotic-Induced Modulation of Microbiota Composition and Antibiotic Resistance Genes Load, an In Vitro Assessment
Source: MDPI journal article supplement (doi:10.3390/ijms25021003), 2024-01-13
Supplement: s1 [file s1]

## Supplementary Material

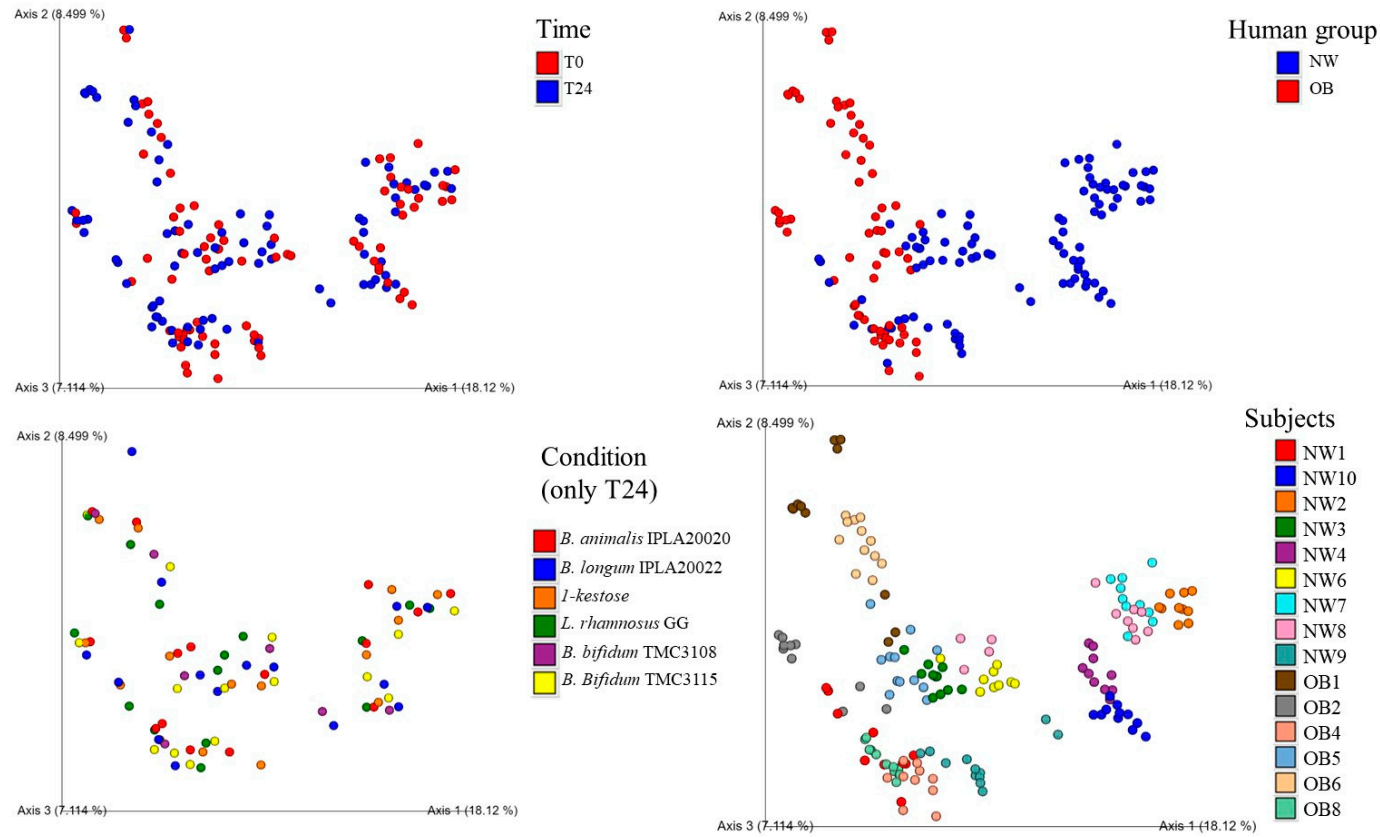

**Supplementary Figure S1.** The comparison of the microbiota communities through principal coordinates (PCoA) of un-weighted UniFrac distance using Emperor in QIIME 2.

**Supplementary Table S1.** Levels (number of copies/g) of the different antibiotic resistance genes quantified at the beginning (T=0) and end of the incubation (T=24).

|                              | <i>tetM</i> |             |         | <i>tetO</i> |             |         | <i>blaTEM</i> |             |         | <i>blaSHV</i> |             |         |
|------------------------------|-------------|-------------|---------|-------------|-------------|---------|---------------|-------------|---------|---------------|-------------|---------|
|                              | T0          | T24         | p-value | T0          | T24         | p-value | T0            | T24         | p-value | T0            | T24         | p-value |
| <i>B.animalis</i> IPLA 20020 | 6.19 ± 0.71 | 5.81 ± 0.60 | 0.012   | 5.90 ± 1.00 | 5.44 ± 0.97 | 0.008   | 10.06 ± 0.73  | 9.61 ± 0.97 | 0.007   | 6.23 ± 0.53   | 6.32 ± 0.65 | 0.109   |
| <i>B.longum</i> IPLA20022    | 6.14 ± 0.69 | 5.63 ± 0.54 | 0.012   | 6.08 ± 1.01 | 5.43 ± 0.85 | 0.008   | 9.83 ± 0.73   | 9.30 ± 1.06 | 0.008   | 6.46 ± 0.74   | 6.23 ± 0.53 | 0.180   |
| Control                      | 5.44 ± 0.31 | 5.62 ± 0.39 | 0.401   | 6.16 ± 0.56 | 5.89 ± 0.79 | 0.767   | 9.60 ± 0.80   | 9.29 ± 0.73 | 0.028   | 6.49 ± 0.90   | 6.56 ± 0.87 | 0.180   |
| <i>L.rhamnosus</i> GG        | 5.97 ± 0.61 | 5.49 ± 0.46 | 0.046   | 5.57 ± 0.76 | 5.11 ± 0.72 | 0.008   | 9.99 ± 0.64   | 9.59 ± 0.69 | 0.012   | 6.44 ± 0.90   | 6.21 ± 0.67 | 0.317   |
| <i>B.bifidum</i> TMC3108     | 6.29 ± 0.41 | 5.14 ± 0.72 | 0.109   | 5.41 ± 1.14 | 5.00 ± 0.83 | 0.109   | 9.38 ± 0.92   | 9.19 ± 0.81 | 0.180   | 6.22 ± 0.29   | 6.22 ± 0.29 | 0.109   |
| <i>B.bifidum</i> TMC3115     | 6.30 ± 0.48 | 5.72 ± 0.30 | 0.018   | 5.70 ± 0.88 | 4.98 ± 0.85 | 0.008   | 9.62 ± 0.88   | 9.08 ± 1.00 | 0.012   | 6.89 ± 1.56   | 6.58 ± 1.54 | 0.715   |
| <i>B.animalis</i> IPLA 20020 | 5.90 ± 0.71 | 5.42 ± 0.83 | 0.028   | 6.27 ± 0.43 | 5.60 ± 0.65 | 0.043   | 9.83 ± 1.96   | 9.57 ± 1.98 | 0.028   | 6.67 ± 0.46   | 6.30 ± 0.16 | 0.746   |
| <i>B.longum</i> IPLA20022    | 6.01 ± 0.74 | 5.45 ± 0.75 | 0.028   | 6.35 ± 0.46 | 5.82 ± 0.40 | 0.043   | 9.82 ± 2.05   | 9.31 ± 2.20 | 0.028   | 6.55 ± 0.38   | 6.32 ± 0.12 | 0.066   |
| Control                      | 5.83 ± 0.64 | 5.65 ± 0.78 | 0.336   | 6.28 ± 0.35 | 6.25 ± 0.33 | 0.249   | 9.89 ± 1.75   | 9.59 ± 1.90 | 0.116   | 6.63 ± 0.38   | 6.39 ± 0.00 | 0.223   |
| <i>L.rhamnosus</i> GG        | 5.62 ± 0.77 | 5.30 ± 0.77 | 0.043   | 6.20 ± 0.33 | 5.64 ± 0.36 | 0.027   | 9.73 ± 2.11   | 9.31 ± 2.05 | 0.028   | 6.38 ± 0.03   | 6.33 ± 0.14 | 0.042   |
| <i>B.bifidum</i> TMC3108     | 5.93 ± 0.44 | 4.91 ± 0.28 | 0.109   | 6.15 ± 0.18 | 5.20 ± 0.97 | 0.180   | 7.57 ± 0.92   | 6.97 ± 1.27 | 0.109   | 7.18 ± 0.35   | 6.13 ± 0.23 | 0.317   |
| <i>B.bifidum</i> TMC3115     | 5.61 ± 0.62 | 5.03 ± 0.62 | 0.028   | 6.13 ± 0.36 | 5.62 ± 0.33 | 0.043   | 9.59 ± 1.78   | 9.21 ± 1.80 | 0.028   | 6.62 ± 0.40   | 6.58 ± 0.44 | 0.039   |

**Supplementary Table S2.** Results from stepwise regression analysis between significant correlated associations of family relative abundances and ARG levels performed individually for OB and NW-fecal cultures.

| Group | ARG           | Model | Variables           | R2     | $\beta$ | <i>p</i> -value |
|-------|---------------|-------|---------------------|--------|---------|-----------------|
| OB    | <i>tetM</i>   | 1     | Bifidobacteriaceae  | 0.321  | -0.57   | 0.00            |
|       |               | 2     | Bifidobacteriaceae  | 0.552  | -0.55   | 0.00            |
|       |               |       | Individual          |        | 0.48    | 0.00            |
|       | <i>tetO</i>   | 1     | Erysipelotrichaceae | 0.575  | -0.759  | 0.00            |
|       |               | 2     | Erysipelotrichaceae | 0.62   | -0.741  | 0.00            |
|       |               |       | Individual          |        | -0.213  | 0.00            |
|       | <i>blaTEM</i> | 1     | Clostridiaceae 1    | 0.176  | 0.419   | 0.01            |
|       |               | 2     | Clostridiaceae 1    | 0.274  | 0.54    | 0.00            |
|       |               |       | Christensenellaceae |        | 0.316   | 0.03            |
|       |               | 3     | Clostridiaceae 1    | 0.372  | 0.211   | 0.20            |
|       |               |       | Christensenellaceae |        | 0.533   | 0.00            |
|       |               |       | Erysipelotrichaceae |        | -0.46   | 0.02            |
|       |               | 4     | Christensenellaceae | 0.345  | 0.59    | 0.00            |
|       |               |       | Erysipelotrichaceae |        | -0.61   | 0.00            |
|       |               | 5     | Christensenellaceae | 0.413  | 0.79    | 0.00            |
|       |               |       | Erysipelotrichaceae |        | -0.69   | 0.00            |
|       |               |       | Individual          |        | -0.31   | 0.04            |
| NW    | <i>tetM</i>   | 1     | Bifidobacteriaceae  | 0.554  | -0.28   | 0.04            |
|       |               |       | Prevotellaceae      |        | 0.14    | 0.28            |
|       |               |       | Streptococcaceae    |        | 0.00    | 1.00            |
|       |               |       | Christensenellaceae |        | 0.07    | 0.68            |
|       |               |       | Ruminococcaceae     |        | 0.28    | 0.06            |
|       |               |       | Acidaminococcaceae  |        | 0.40    | 0.01            |
|       |               |       | Veillonellaceae     |        | 0.00    | 0.99            |
|       |               |       | Enterobacteriaceae  |        | 0.08    | 0.74            |
|       | <i>tetO</i>   | 1     | Bifidobacteriaceae  | 0.3999 | -0.23   | 0.13            |
|       |               |       | Prevotellaceae      |        | -0.03   | 0.83            |
|       |               |       | Ruminococcaceae     |        | 0.48    | 0.14            |
|       |               |       | Veillonellaceae     |        | -0.19   | 0.35            |
|       |               |       | Enterobacteriaceae  |        | 0.10    | 0.57            |
|       |               | 2     | Bifidobacteriaceae  | 0.378  | -0.33   | 0.02            |
|       |               |       | Prevotellaceae      |        | 0.09    | 0.43            |
|       |               |       | Ruminococcaceae     |        | -0.09   | 0.45            |
|       |               |       | Enterobacteriaceae  |        | 0.44    | 0.00            |

|               |   |                     |       |       |      |
|---------------|---|---------------------|-------|-------|------|
| <i>blaTEM</i> | 1 | Bifidobacteriaceae  | 0.521 | -0.22 | 0.11 |
|               |   | Prevotellaceae      |       | 0.25  | 0.07 |
|               |   | Streptococcaceae    |       | -0.23 | 0.43 |
|               |   | Christensenellaceae |       | 0.50  | 0.01 |
|               |   | Ruminococcaceae     |       | -0.20 | 0.19 |
|               |   | Acidaminococcaceae  |       | 0.37  | 0.03 |
|               |   | Veillonellaceae     |       | 0.44  | 0.02 |
|               | 2 | Enterobacteriaceae  | 0.516 | -0.18 | 0.46 |
|               |   | Bifidobacteriaceae  |       | -0.20 | 0.14 |
|               |   | Prevotellaceae      |       | 0.21  | 0.09 |
|               |   | Streptococcaceae    |       | -0.07 | 0.74 |
|               |   | Christensenellaceae |       | 0.42  | 0.01 |
|               |   | Ruminococcaceae     |       | -0.17 | 0.25 |
|               |   | Acidaminococcaceae  |       | 0.44  | 0.00 |
|               | 3 | Veillonellaceae     | 0.719 | 0.42  | 0.02 |
|               |   | Bifidobacteriaceae  |       | -0.18 | 0.07 |
|               |   | Prevotellaceae      |       | 0.14  | 0.15 |
|               |   | Streptococcaceae    |       | 0.12  | 0.43 |
|               |   | Christensenellaceae |       | 0.31  | 0.01 |
|               |   | Ruminococcaceae     |       | -0.08 | 0.47 |
|               |   | Acidaminococcaceae  |       | 0.39  | 0.00 |
|               | 4 | Veillonellaceae     | 0.785 | 0.04  | 0.78 |
|               |   | Lachnospiraceae     |       | -0.51 | 0.00 |
|               |   | Bifidobacteriaceae  |       | -0.19 | 0.04 |
|               |   | Prevotellaceae      |       | 0.18  | 0.04 |
|               |   | Streptococcaceae    |       | -0.17 | 0.28 |
|               |   | Christensenellaceae |       | 0.15  | 0.18 |
|               |   | Ruminococcaceae     |       | -0.29 | 0.01 |
|               | 5 | Acidaminococcaceae  | 0.777 | 0.42  | 0.00 |
|               |   | Veillonellaceae     |       | 0.01  | 0.93 |
|               |   | Lachnospiraceae     |       | -0.39 | 0.00 |
|               |   | Burkholderiaceae    |       | -0.38 | 0.00 |
|               |   | Bifidobacteriaceae  |       | -0.21 | 0.02 |
|               |   | Prevotellaceae      |       | 0.17  | 0.05 |
|               |   | Streptococcaceae    |       | -0.20 | 0.18 |
|               |   | Ruminococcaceae     |       | -0.34 | 0.00 |
|               |   | Acidaminococcaceae  |       | 0.48  | 0.00 |

|                    |                    |                     |       |                     |       |       |      |
|--------------------|--------------------|---------------------|-------|---------------------|-------|-------|------|
| blaSHV             | 6                  | Veillonellaceae     | 0.809 | -0.03               | 0.83  |       |      |
|                    |                    | Lachnospiraceae     |       | -0.39               | 0.00  |       |      |
|                    |                    | Burkholderiaceae    |       | -0.43               | 0.00  |       |      |
|                    |                    | Bifidobacteriaceae  |       | -0.17               | 0.05  |       |      |
|                    |                    | Prevotellaceae      |       | 0.15                | 0.07  |       |      |
|                    |                    | Streptococcaceae    |       | -0.30               | 0.05  |       |      |
|                    | Ruminococcaceae    | -0.26               | 0.02  |                     |       |       |      |
|                    | Acidaminococcaceae | 0.34                | 0.00  |                     |       |       |      |
|                    | Veillonellaceae    | -0.11               | 0.39  |                     |       |       |      |
|                    | Lachnospiraceae    | -0.29               | 0.00  |                     |       |       |      |
|                    | Burkholderiaceae   | -0.37               | 0.00  |                     |       |       |      |
|                    | Individual         | -0.31               | 0.01  |                     |       |       |      |
|                    | 1                  | Bifidobacteriaceae  | 0.322 | 0.43                | 0.01  |       |      |
|                    |                    | Prevotellaceae      |       | -0.11               | 0.48  |       |      |
|                    |                    | Streptococcaceae    |       | 0.23                | 0.52  |       |      |
|                    |                    | Christensenellaceae |       | 0.65                | 0.00  |       |      |
|                    |                    | Ruminococcaceae     |       | 0.36                | 0.05  |       |      |
|                    |                    | Acidaminococcaceae  |       | -0.06               | 0.75  |       |      |
|                    |                    | Veillonellaceae     |       | 0.30                | 0.16  |       |      |
|                    |                    | Enterobacteriaceae  |       | 0.14                | 0.63  |       |      |
|                    |                    | 2                   |       | Bifidobacteriaceae  | 0.316 | 0.41  | 0.01 |
|                    |                    |                     |       | Prevotellaceae      |       | -0.05 | 0.68 |
|                    |                    |                     |       | Christensenellaceae |       | 0.71  | 0.00 |
|                    |                    |                     |       | Ruminococcaceae     |       | 0.29  | 0.05 |
|                    |                    |                     |       | Acidaminococcaceae  |       | -0.11 | 0.54 |
|                    |                    |                     |       | Veillonellaceae     |       | 0.36  | 0.05 |
| Enterobacteriaceae | 0.00               |                     | 0.99  |                     |       |       |      |

$\beta$ , standardized regression coefficient;  $R^2$ , adjusted coefficient of multiple determination;  $p$ ;  $p$  value.
